# Supplementary material for: Apigeninidin chloride disrupts Toxoplasma gondii Mitochondrial membrane potential and induce reactive oxygen species and metabolites production
Source: Front Cell Infect Microbiol. 2024 Nov 11;14:1368019. doi: 10.3389/fcimb.2024.1368019 (PMC11586383; doi:10.3389/fcimb.2024.1368019)
Supplement: Supplementary file 8 [file Table3.xlsx]

## Sheet: Sheet1
																						Means Relative Areas of Abundance
Fatty Acids	Formula	Annot. DeltaMass [ppm]	Calc. MW	RT [min]	# ChemSpider Results	# mzCloud Results	mzCloud Best Match	mzCloud Best Match Confidence					AZ (24hr)	AZ (48hr)	APi (48hr)	APi (24hr)	Control (24hr)	Control (48hr)	Control (48hr)
Furan Fatty Acid F6 (19FU-FA)												Furan Fatty Acid F6 (19FU-FA)	2198620	4617120	2574250	1017890	5219530	4994600	4994600
Palmitic Acid (C16:0)												2-Hydroxypropyl stearate	2415680	5041790	2980760	824618	4930060	5330570	5330570
Juniperic acid (FA 16:0)	C16 H32 O3	0.02	272.235	6.973	25	0						3-Oxodocosanoic acid (C22:10)	2328630	4085500	2275340	753188	4397880	4904090	4904090
2-Hydroxypropyl stearate (P2163)												4-(Stearoylamino)butanoic acid (N-Stearoyl GABA)	834580	3805990	2017930	162423	4170800	4490650	4490650
3-oxopalmitic acid (C-3O)	C16 H30 O3	0	270.219	4.577	19	0						12-HAS (12-Hydroxy Stearic Acid )	2237120	4046520	2032900	653231	6408130	5801390	5801390
Lesquerolic acid (C 20:1;O)	C20 H38 O3	0.16	326.282	7.914	7	0						Eicosapentanoic acid (C21:5n3)	176794	1766150	836745	129974	2114350	582514	582514
3-Oxodocosanoic acid (C22:1;0)												2-Hydroxytricosanoic acid (C23:0;O)	1018010	2010020	1245440	276707	2234510	2401770	2401770
Lesquerolic acid (C 20:1;O)	C20 H38 O3	0.16	326.282	8.39	7	0						Myristic acid (C 14:0)	1470930	2116580	1242270	260846	2608970	2623860	2623860
Heptacosylic acid (C27:0)	C27 H54 O2	0.32	410.413	14.409	5	0						Nonadecanedioic acid (C19:0)	2445580	3951710	2129580	1000270	4200440	4612480	4612480
4-(Stearoylamino)butanoic acid (N-Stearoyl GABA)												1-Oleoyl-rac-glycerol (C18:1)	1856800	3049700	1560910	667126	3235370	3655510	3655510
12-Hydroxy Stearic Acid (12-HAS)												Pentacosanoic acid (C 25:0)	983935	2974040	1056370	422655	2818250	3170970	3170970
3-oxopalmitic acid (C-3O)	C16 H30 O3	0.03	270.219	5.654	19	0						16-Hydroxyhexadecanoic acid (16-OH 16:0)	5993740	15690200	28719900	1485750	16310300	15739600	15739600
Lithocholic Acid (C24:1;O3)	C24 H40 O3	95606.8	412.274	8.759	0	3	69.6	66.9				Palmitic Acid (FA 16:0)	83313800	154405000	85761800	22187600	184247000	199320000	199320000
Margaric acid (C17:0)	C17 H34 O2	0.05	270.256	9.384	34	0						1-Palmitoyl lysophosphatidic acid (LysoPA(0:0/16:0)	550532	432120	366837	185492000	410297	405924	405924
Ricinelaidic acid (12-OH 9t-18:1)	C18 H34 O3	0.07	298.251	6.329	72	0						Stearic acid (C18:0)	12349700	118184000	39262200	12819500	157349000	148441000	148441000
16-Hydroxyhexadecanoic acid (16-OH 16:0)												Icosanedioic acid	36564000	65069900	43148200	9144680	80046700	91416300	91416300
Eicosapentanoic acid (C21:5n3)												(2S,4S,6S,8S,10S,12S,14S,16S,18S)-24681012141618-Nonamethylhexatriacontanoic acid (C45)	2980880	8141340	920236	1540080	16575500	16310900	16310900
2-Hydroxytricosanoic acid (C 23:0;O)												Heptatriacontanoic acid (C37:0)	724652	5313970	772316	338150	6325050	9831730	9831730
Myristic acid (FA 14:0)												23-Methyltetracontanoic acid (1:0/14:0)	3016060	9293400	1705140	1957700	16377300	14811100	14811100
Montanic acid (FA 28:0)	C28 H56 O2	0.37	424.428	14.577	10	0						Stearyl behenate (18:0/22:0)	2055580	10187400	1984640	2174420	13742200	9630540	9630540
2-Hydroxytricosanoic acid (C23:0;O)	C23 H46 O3	0.22	370.345	9.842	1	0						Cetyl palmitate (16:0/16:0)	2675200	7395140	3485560	1109980	12570000	9272770	9272770
Nonadecanedioic acid (C19:0)												Arachidyl behenate (20:0/22:0)	4484830	16057500	2303550	2948360	28241700	22283300	22283300
1-Oleoyl-rac-glycerol (C18:1)												Octadecyl heptadecanoate (18:0/17:0)	2990720	7249830	263852	1985420	16906500	13884200	13884200
Pentacosanoic acid (C 25:0)												Cholesterol sulfate (cholest-5-en-3β-ol sulfate)	8213340	14245200	8023970	13391800	15854000	16216500	16216500
2-(8-Hydroxy-4a,8-dimethyldecahydro-2-naphthalenyl)acrylic acid (ilicic acid)	C15 H24 O3	-71421.7	234.162	2.143	70	2	88.8	9.4				Glycol stearate	987150	3182540	430045	243398	1537890	1993170	1993170
Psyllic acid (C 33:0)	C33 H66 O2	-0.09	494.506	15.384	5	0						Hexadecyl tricosanoate (16:0/23:0)	18496300	21924400	3012950	19442000	37869000	34729400	34729400
1-Palmitoyl lysophosphatidic acid (LysoPA(0:0/16:0)												1324-Trihydroxy-24-(hydroxymethyl)-919-cyclolanostan-28-oic acid	3148180	3566850	435613	1387780	12692600	9091340	9091340
2-Dodecylbenzenesulfonic acid	C18 H30 O3 S	-0.07	326.192	6.238	2	0						1-docosanoyl-2-(4Z,7Z,10Z,13Z,16Z,19Z-docosahexaenoyl)-glycero-3-phosphate	2650450	1322010	3628410	1329710	4842640	2896650	2896650
Stearic acid (C18:0)												1-Eicosapentaenoyl-2-docosahexaenoyl-sn-glycero-3-phosphocholine	46089700	20080000	10702100	32246800	6584190	22442700	22442700
Icosanedioic acid
Heptacosylic acid (C27:0)	C27 H54 O2	0.29	410.413	13.299	5	0
(2S,4S,6S,8S,10S,12S,14S,16S,18S)-2,4,6,8,10,12,14,16,18-Nonamethylhexatriacontanoic acid (C45)
Melissic acid (C30:0)	C30 H60 O2	0.2	452.459	14.435	10	0
Heptatriacontanoic acid (C37:0)
Arabic acid	C5 H10 O6	2.6	166.048	3.974	5	0
Hentriacontylic acid (C31:0)	C31 H62 O2	0.17	466.475	15.503	25	0
23-Methyltetracontanoic acid (1:0/14:0)
4-Undecylbenzenesulfonic acid	C17 H28 O3 S	-0.03	312.176	5.293	1	0
Stearyl behenate (18:0/22:0)
Cetyl palmitate (16:0/16:0)
Arachidyl behenate (20:0/22:0)
Octadecyl heptadecanoate (18:0/17:0)
Cholesterol sulfate (cholest-5-en-3β-ol sulfate)
Glycol stearate
Ubiquinone Q4	C29 H42 O4	0.17	454.308	8.579	3	0
2-Hydroxypropyl stearate	C21 H42 O3	0.1	342.313	8.802	8	0
Hexadecyl tricosanoate (16:0/23:0)
Myristyl sulfate	C14 H30 O4 S	0.19	294.187	6.18	1	2	91.3	9.6
1,3,24-Trihydroxy-24-(hydroxymethyl)-9,19-cyclolanostan-28-oic acid (1alpha,3beta,4alpha,24S)
(2R)-1-[(13Z)-13-Docosenoyloxy]-3-(phosphonooxy)-2-propanyl (4Z,7Z,10Z,13Z,16Z,19Z)-4,7,10,13,16,19-docosahexaenoate (C22:6(omega-3) (1-)	C47 H79 O8 P	4.86	802.555	12.972	8	0
(2R)-1-[(4Z,7Z,10Z,13Z,16Z)-4,7,10,13,16-Docosapentaenoyloxy]-3-(phosphonooxy)-2-propanyl (15Z)-15-tetracosenoate (4Z, 10Z, 13Z, 16Z- docosatetraenoic acid, methyl ester)
